# Supplementary material
Source: PubMed Central journal article supplement (PMC8433530)
Supplement: pnas.2103642118.sapp.pdf [file pnas.2103642118.sapp.pdf]

## 1 **Materials and Methods**

2 *Animals:* A total of 29 male Long Evans rats with an average age of 18.4 (SEM=1.2) weeks were  
3 used in this study. Rats were maintained on a 12/12 light/dark cycle. The local ethical  
4 committee on animal experimentation (canton of Fribourg), approved all experimental  
5 procedures.

6 *Operant chamber:* Behavioral sessions were conducted in an operant chamber (32 × 32 × 55  
7 cm) equipped with one lever, a house light and a reward light at the feeding trough. A camera  
8 and a speaker were mounted 60 cm above the arena. The operant chamber (lever press read  
9 out, house light, food light and the reward dispenser) were controlled by a PC with custom  
10 MATLAB scripts.

11 *Lever press training:* Following recovery from the viral injection surgery, animals were lightly  
12 food restricted to be within 90-95% of their free feeding weight. Animals were then trained to  
13 press a lever to receive a food reward, (45mg, chocolate flavored sucrose pellets, TestDiet  
14 Richmond IN). Following acquisition of lever pressing the number of presses required to  
15 receive a reward were increased until animals were consistently responding on fixed ration  
16 (FR) 14 schedule, i.e. the animal had to press the lever 14 times in order to receive a single  
17 reward. Following acquisition of the FR schedule animals were transitioned to a variable  
18 interval (VI) schedule until stable lever pressing was achieved at a VI interval 30 +/-5s, and  
19 they had received a minimum of 600 rewards. Each behavioral session consisted of 56 trials  
20 with a trial duration of 60±5s and inter-trial intervals of 9±1s with the house light off.  
21 Additional lever press re-training sessions were conducted following the recovery period of  
22 optic fiber/electrode implantation prior to the auditory discrimination task.

23 *Viral injections:* Anesthesia was induced with ketamine (100 mg/kg) and xylazine (20 mg/kg),  
24 and maintained using 1-2% isoflurane in pure O<sub>2</sub> inhalation. Animals were placed into a

25 stereotaxic device, and a midline incision was made on the scalp. Two small burr holes were  
26 made over the left and right basal forebrain targets AP: -0.8; ML:  $\pm$  2.8, and a custom-made  
27 26 gauge infuser was lowered to the target site (DV: -8mm). One of four viral constructs  
28 (University of North Carolina Vector Core; n=12 rats with AAV5-hSynhChR2(H134R)-mCherry;  
29 n=13 AAV5-hSyn-eArch3.0-EYFP, n=2 AAV5-hSyn-mCherry, n=2 AAV5-hSyn-EYFP) were  
30 injected bilaterally (volume: 1  $\mu$ L), using a Hamilton syringe driven by a dual syringe pump (Kd  
31 Scientific, Holliston, MA) at 0.1  $\mu$ L/min. The viral infuser was left in place for 10 minutes  
32 following each injection before it was slowly removed.

33 *Implantation of electrodes and optic fibers:* After viral infusion and initial lever press training  
34 in the operant chamber, animals underwent a second surgery to insert optrodes, (240  $\mu$ m  
35 diameter; Doric lenses, or custom made optrodes; 225  $\mu$ m diameter) bilaterally into the VP  
36 (AP -0.8; ML  $\pm$  2.8; DV -8). Additionally two tungsten microelectrodes with tip resistances of  
37  $\sim$ 400 k $\Omega$  (FHC Inc Bowdoin ME) were implanted bilaterally in the ACC (AP 3; ML  $\pm$  0.8; DV -3).  
38 Electrodes and optrodes were secured to the skull surface with five stainless steel screws and  
39 dental cement. An additional screw over the cerebellum served as a reference. Electrodes and  
40 EEG screws were wired to a customized 10 pin connector/PCB board attached to a ziff clip  
41 (TDT Apalucha, FL) head stage. The skull was covered with dental acrylic, and sutures were  
42 placed at both the anterior and posterior terminations of the incision. Postoperatively the  
43 animal received a single dose of Buprenorphine (.05 mg/Kg) and Vetramil ointment was  
44 applied to the margins of the incision. Animals received postoperative analgesia in the form  
45 of Paracetamol dissolved in their drinking water 2mg/ml for 3 to 4 days following the surgery.  
46 Experiments were conducted >5 weeks post viral injection and at least one week following  
47 optic fiber/electrode implantation.

48 *Electrophysiology:* LFP data was acquired through a unity gain head stage (TDT Alachua, FL)  
49 and was sampled at 2.4 kHz and band pass filtered between .5 and 300 Hz using an RZ5  
50 amplifier (TDT) and stored on a PC for offline analysis. To minimize the risk of cable  
51 disturbances during freely moving animal recordings, cables were connected to a commutator  
52 (TDT, ACO 32) or a rotary joint (Doric lenses, HRJ-OE\_FC\_12\_HARW).

53 *Optical stimulation:* A 200- $\mu$ m dual branching patch cord was connected to the external  
54 portion of the chronically implanted optical fibers (Doric Lenses, M3-thread). Patch cords were  
55 attached to a 473-nm blue laser or to a 594-nm yellow laser (Changchun New Industries  
56 Optoelectronics, China). Laser intensity was set daily at the output of the patch cord to be  $\sim$ 40  
57 mW/mm<sup>2</sup> using an optical power meter (PM 100D, Thorlabs Newton NJ). In ChR2 animals,  
58 stimulation was delivered using 40 Hz square pulses with a duty cycle of 50%, for 8 seconds  
59 followed by a one second inter-stimulus interval. The stimulation protocol was controlled by  
60 a pulse generator (Rigol, Beaverton OR) triggered by a TTL from the RZ5 recording device. In  
61 Arch animals, stimulation was delivered using continuous light for 8 seconds followed by one  
62 second inter-stimulus interval controlled directly by the RZ5.

63 *Home cage optogenetics:* A plastic box (30 x 50 x 40 cm) with nesting material and a drinking  
64 bottle attached, served as a home cage like environment for recording sessions to validate VP  
65 optogenetics in the absence of operant behavior.

66 *Operant chamber VI30 sessions:* To examine the impact of VP optogenetics on lever press  
67 behavior we conducted sessions in the operant chamber with VI30 reward schedule. A session  
68 consisted of 28 trials per stimulation condition (ChR2/Arch on and off) in pseudo-randomized  
69 order, with the caveat that no single condition was allowed to repeat more than three times.

70 *Auditory stimuli:* We imported four instrumental music recordings (Chopin Fantasy Op.49 in  
71 F-minor; Bach Cello Suite Nr.1 Prelude; Beethoven March in D, Smetana Moldau) as MP3 files

72 in MATLAB (2018a). Music was up-sampled by a factor of three, shifting auditory stimulus  
73 frequencies to higher registers, in accordance with the frequency sensitivity of the rat.  
74 Suitable music segments of 8s were selected for discrimination studies. Fourier amplitude was  
75 equalized among the four 8s music segments, ensuring that all music segments possessed  
76 equal spectral content. Music stimuli were ramped (100ms) to avoid sudden sounds at the  
77 beginning and end of the stimulus.

78 *Auditory discrimination task:* For auditory discrimination training, four unique musical  
79 segments of 8 second duration were used, with 2 segments serving as S+ and 2 segments  
80 serving as S- conditions (S+A, S-A, S+B, S-B). In stimulus set A Beethoven and Chopin served  
81 either as S+ or S- and in stimulus set B Smetana or Bach served as S+ or S-. Optogenetic  
82 stimulation was paired with one S+ and one S- segment, while the other segments served as  
83 control conditions. Each session consisted of 56 trials with trial durations randomized at 60±5  
84 s and matched such that the animal spent an equal amount of time in each condition. Each  
85 musical segment was presented 14 times, with no condition allowed to repeat more than  
86 three times in a row. Responses during S+ trials were rewarded on a VI 30 schedule, with the  
87 maximum VI time being less than the minimum trial time, meaning that the animal had the  
88 possibility of getting a reward in any S+ trial. The 8s musical stimuli were looped during the  
89 duration of the trial, with an inter-stimulus interval of 1s. Optogenetic stimulation was  
90 presented throughout the duration of the appropriate trials. Discrimination performance was  
91 measured independently for the stimulated vs non stimulated S+ S- pairs, as percent correct,  
92  $S^+$  lever presses / ( $S^+$  +  $S^-$  lever presses). In order to make certain that differences in  
93 performance between the control and opto conditions were not due to simple differences in  
94 discriminability between the stimulus sets, performance without optogenetic intervention  
95 was assessed for the different stimuli. Specifically we measured performance for both

96 stimulus pairs by comparing the number of sessions to reach a discrimination performance  
97 better than 70%, with animals learning each pairing equally well, (Stimulus Set A; n=9,  
98 mean=14.7±3 sessions, Stimulus Set B; n=9 , mean=13.6±1.8 sessions, t-test, p=0.76). To  
99 compare learning performance between control and opto conditions within groups of  
100 animals, learning curve segments of seven subsequent sessions were selected per animal  
101 when the performance of one of the two stimulus sets went over 50% correct.

102 *Generalization task:* To study rat's ability to generalize to other, similar musical pairings, we  
103 presented novel segments of the same musical pieces. Generalization sessions were  
104 conducted without optogenetics, but were otherwise identical to the learning conditions.

105 *LFP power analyses:* To calculate VP power spectrograms (see Fig.3A, E), we extracted power  
106 over time by using multi-taper-method implemented in the Fieldtrip toolbox  
107 (<http://fieldtriptoolbox.org>; Donders Institute for Brain, Cognition and Behaviour, Radboud  
108 University, Netherlands) (42) with a Hanning time window of 500ms (step size: 10ms) and  
109 frequency steps of 1Hz. Extracted power data over frequency and time was averaged over  
110 trials and plotted for the frequency and time range of interest. For the spectrogram shown in  
111 Fig.7E, the VP LFP was down-sampled to 500Hz and fast Fourier transform with log<sub>10</sub>-scale  
112 was computed for 2s data epochs. Finally, power data was plotted over time with a frequency  
113 resolution of 1Hz. For power spectrum analyses of VP and ACC data (Fig.3B, C, F), fast Fourier  
114 transform was performed with log<sub>10</sub>-scale of 8s epochs and averaged over 64 trials of each  
115 stimulation condition (on/off) per Arch (n=6) and ChR2 (n=8) rat. For statistical comparison  
116 between stimulation conditions, in Arch rats (Fig.3C) power values were averaged in the  
117 gamma range of 40 to 60Hz. In ChR2 rats (Fig.3F), the 40Hz power peak was detected per  
118 animal of the averaged ChR2 on trials and divided by the 40Hz power value of the ChR2 off  
119 condition. To analyze the gamma power during grooming, segments of the LFP during

120 grooming were concatenated and divided into 1 second epochs and FFT analysis computed.  
121 For lever pressing the LFP was selected at  $\pm 1s$  to the lever press and FFT analysis was again  
122 performed on one second epochs. For *other behaviors* LFP epochs were taken from periods  
123 that contained no grooming or lever pressing and aging analysis was performed on one second  
124 epochs of the LFP. All LFP data was down sampled to 500 Hz and FFT transformations were  
125  $\log_{10}$ -scaled, with a frequency resolution of 1Hz). Only behavioral segments without any  
126 optogenetic stimulation were included. Gamma power peaks were detected between 40 and  
127 60Hz per behavior condition and animal for subsequent comparison analyses (Fig.7G).

128 *Behavioral Monitoring:* Based on video recordings of operant chamber learning sessions, time  
129 segments with different behaviors were manually scored by using the ELAN behavioral  
130 tracking software (<https://tla.mpi.nl/tools/tla-tools/elan/>; Max Planck Institute for  
131 Psycholinguistics). Behavioral scorings were then aligned with electrophysiological data based  
132 on recording starting times.

133 *Gamma burst detection:* VP gamma bursts were detected by detrending and bandpass filtering  
134 (45–60 Hz) the LFP signal. The amplitude threshold was calculated individually for each animal  
135 and session as 2 SDs from the mean. Burst beginning and end times were then defined as the  
136 points at which the amplitude fell below 1.5 SDs before and after the detected burst. Only  
137 gamma bursts with a length of 100–500 ms were included in subsequent analyses.

138 *Granger Causality Analyses:* To study directional influences in the gamma band in the VP and  
139 ACC, Granger causality spectral analyses were performed during VP gamma burst epochs,  
140 band pass filtered between 45-60 Hz. Unfiltered LFP signals were segmented into epochs of  
141 160 ms centered on the detected bursts. Based on those epochs, we performed bivariate  
142 (n=12 animals) Granger causality analyses by using the MVGC multivariate Granger causality

143 toolbox (44). Here, the LFP epochs were transformed to auto-covariance data by setting the  
144 maximal model order of 20 according to the Akaike Information Criterion.

145 *Histology:* Rats were deeply anesthetized with 100 mg/Kg pentobarbital, then perfused  
146 transcardially with 400mL 0.1M phosphate buffer Saline (PBS) (pH 7.4) followed by 400 mL  
147 cold 4% paraformaldehyde in 0.1M PBS. Brains, then were placed in the same fixative  
148 overnight at 4°C. Whole brains were then rinsed 3 times for 20 minutes each, in cold 0.1M  
149 PBS and cryoprotected by immersion in sucrose gradient (15 and 30% w/v sucrose) until they  
150 sank. Brains were then blocked and fast frozen in dry-ice chilled isopentane and stored at least  
151 overnight at -20°C before cryosectioning. Brains were cut into 40µm-thick coronal sections  
152 using a sliding microtome (MICROM HM 440E, Microm International GmbH, Walldorf,  
153 Germany). Every third section was kept in a storage solution (30% ethylene glycol and 30%  
154 glycerol in 0.1M Phosphate Buffer) at -20°C. To determine electrode track positions, sections  
155 were mounted on Super Frost<sup>®</sup> Plus Adhesion slides (Fisher Scientific AG, Reinach CH), stained  
156 for nuclei and Nissl bodies, using a 0.5% Cresyl violet (acetate) and coverslipped using EuKitt  
157<sup>®</sup> Quick-hardening mounting medium (Sigma-Aldrich Chemie GmbH, Switzerland). To visualize  
158 the virus-mediated expression of ChR2-mCherry and Arch-eYFP by fluorescence, sections  
159 where mounted, air-dried, and cover slipped using an aqueous Vectashield<sup>®</sup> antifade  
160 mounting media with Dapi (Vector Laboratories, Inc., Burlingame, CA, USA, H-1200). Nissl Stain  
161 and virus expression were imaged using a NanoZoomer 2.0-HT slide scanner (Hamamatsu  
162 Photonics), with a 2x20 0.75 NA air objective and at a resolution of 0.23µm/pixel. Visualization  
163 and analysis was done with the NDP.view 2 freeware (Hamamatsu Photonics).

164 *Immunohistochemistry:* We performed immunohistochemistry for the specific neuronal  
165 markers ChAT and GAD67 on adjacent sections from the same brain specimens extending  
166 anterior to posterior through the ventral pallidum (coordinates from Bregma -0.48/-0.60 to

167 Bregma -1.08) spaced every sixth 40- $\mu$ m thick section for each marker at regular intervals.  
168 Free-floating sections were prepared by rinsing in 0.1 M phosphate buffered saline (PBS) for  
169 20 min, then sections were treated with Heat Induced Epitope Retrieval (HIER) in a Tris-EDTA  
170 based solution at pH 9.0 to unmask the antigens and epitopes and thus enhance staining  
171 intensity of antibodies. Then sections were permeabilized for 90 min with 0.1 M PBS + 0.2%  
172 Triton X-100, followed by incubation in blocking solution for 2 h. at RT containing 0.1M PBS-  
173 0.05% Triton X-10, 0.3 M Glycine, and 10% Normal Donkey Serum (NDS) (Abcam, AB 7475).  
174 Thereafter, sections were incubated with mouse anti-GAD67 (1:1000; Millipore, MAB5406)  
175 and goat anti-ChAT (1:200; Millipore, AB144P) in 0.05% Tween 20, 5% NDS and 0.02% NaN<sub>3</sub> in  
176 0.1M PBS for 48 h at 4°C. Sections were washed in 0.1M PBS + 0.05% Tween 20 + 1% NDS four  
177 times, 20 min each, and then incubated in Alexa Fluor-488-tagged donkey anti-mouse IgG  
178 (1:400; Jackson Immuno Research, Europe Ltd, UK; Cat N.: 715-545-151) or Alexa Fluor-488-  
179 tagged donkey anti-goat IgG (1:200; Sigma-Aldrich Co., St Louis, MO, USA, Cat N.:  
180 SAB4600032), or Alexa Fluor-594- tagged donkey anti-mouse IgG (1:800; Jackson Immuno  
181 Research, Europe Ltd, UK; Cat N.: 715-585-150) or Alexa Fluor-594-tagged donkey anti-goat  
182 IgG (1:200, Jackson Immuno Research, Europe Ltd, UK; Cat N.: 705-585-147 for 16 h at 4°C.  
183 Sections were then counterstained with DAPI at 0.5  $\mu$ g/mL for 5 min. and mounted on Super  
184 Frost Plus microscopic slides, and cover-slipped with 90% glycerol + 0.5% N-propyl gallate in  
185 20mM Tris pH 8.0. Images were collected using a 1.30 NA 63X glycerol-immersion objective  
186 on a Leica TCS SP5 Laser scanning confocal microscope (Leica Microsystems AG, Switzerland))  
187 and analyzed using LAS X software (version 3.3.0, Leica Microsystems). Image processing was  
188 performed with the ImageJ/Fiji software (NIH, Bethesda, MD, USA).

189 *Quantification using stereological methodology:* To estimate the number Chr2-mCherry and  
190 Arch-eYFP positive cells that co-labeled with ChAT positive neurons and GAD67 positive



191 neurons in the Ventral Pallidum (VP), we employed the unbiased stereological technique using  
192 the optical fractionator workflow in MBF Stereo Investigator (Version 2019.1.3,  
193 MicroBrightField, Williston, VT, USA), in combination with a Zeiss Axioplan Fluorescence  
194 microscope (Zeiss, Jena, Germany), connected to an Orca-05G monochrome digital Camera  
195 (Hamamatsu, Japan) and coupled with a motorized x-y precision stage system BioPoint 2 (Ludl  
196 Electronic Products, LTD, NY, USA). Cells were counted with a 63x NA 1.40 immersion oil  
197 objective with a mean section thickness of 28.6  $\mu\text{m}$ . The VP was sampled in every sixth  
198 consecutive 40 $\mu\text{m}$  section, yielding 6 to 8 for analysis (GAD67 (n=3-4) or ChAT (n=3-4)  
199 respectively. The VP region of interest was first identified under 5x magnification. A 70 $\times$  70  
200  $\mu\text{m}$  counting frame was used and a sampling grid area (xy) that covered the region of interest.  
201 At each sampling location, the microscope was focused down through the disector sample to  
202 count any cell within that particular counting frame. Only clear cell bodies were counted.  
203 Guard zones of 0.5 $\mu\text{m}$  at the top and bottom of each slice were used with an optical disector  
204 height of 25  $\mu\text{m}$ . The VP region of interest extended from -0.48/-0.60mm anterior to -1.08 mm  
205 posterior to bregma. Two Chr2- and two Arch- animals were analyzed. Counts represent the  
206 mean from 3-4 four sections per animal.
